# Supplementary material for: Identification of Natural Lead Compounds against Hemagglutinin-Esterase Surface Glycoprotein in Human Coronaviruses Investigated via MD Simulation, Principal Component Analysis, Cross-Correlation, H-Bond Plot and MMGBSA
Source: MDPI journal article supplement (doi:10.3390/biomedicines11030793), 2023-03-06

# Identification of Natural Lead Compounds against Hemagglutinin Esterase Surface Glycoprotein in Human Coronaviruses Investigated via MD Simulation, Principal Component Analysis, Cross-Correlation, H-bond Plot and Mmgbsa

Iqra Ali, Muhammad Asif Rasheed, Simona Cavalu , Kashif Rahim, Sana Ijaz, Galal Yahya, Lucky Poh Wah Goh and Mihaela Popoviciu

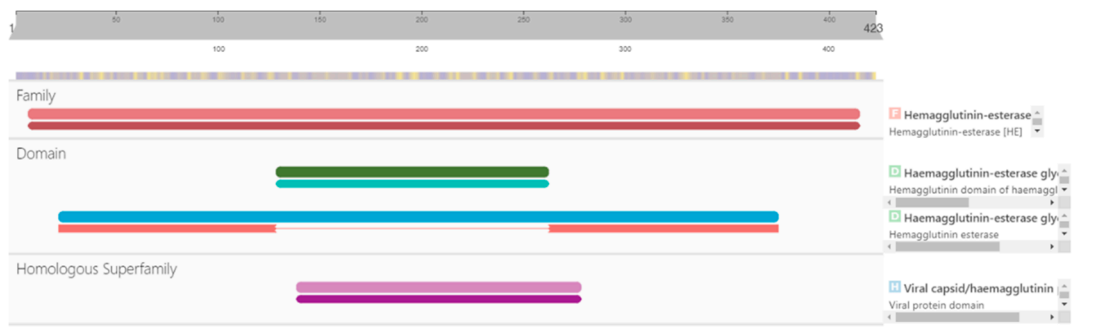

Figure S1. Domain architecture of HE Protein.

Table S1. Calculated values of MMGBSA with different parameters of HE protein- calceolarioside B complex.

| Binding Energy Component | Average  | Std. Dev. | Std. Err. of Mean |
|--------------------------|----------|-----------|-------------------|
| VDWAALS                  | -46.4165 | 3.6572    | 0.2111            |
| EEL                      | -9.4782  | 3.4782    | 0.2008            |
| EGB                      | 23.0200  | 3.0008    | 0.1733            |
| ESURF                    | -4.8051  | 0.3681    | 0.0213            |
| DELTA G gas              | -55.8948 | 5.6366    | 0.3254            |
| DELTA G solv             | 18.2149  | 2.8397    | 0.1639            |
| DELTA TOTAL              | -37.6799 | 3.7919    | 0.2189            |

Table S2. (A) 12-Hydroxy-10,13-dimethyl-2,4,5,6,17-dione, (B) AZ628, (C) Telaprevir, (D) Verdinexor, (E) 4-[3-(morpholine-4-carbonyl)-5-[4-(trifluoromethyl)phenyl]pyrazol-1-yl]benzenesulfonamide, (F) 3,4 dihydroxyphenylacetic acid (G) aminomethyl(phenyl)phosphinic acid, (H) 3-[2-(3-cyanatophenoxy)ethoxy]phenyl cyanate, (I) N-[(4,5-difluoro-1H-benzimidazol-2-yl)methyl]-9-(3-fluorophenyl)-2-morpholin-4-ylpurin-6-amine, (J) N-(2-methyl-4-phenylbut-3-en-2-yl)-1-phenylmethanimine, (K) Ruboxistaurin, (L) Daunorubicin, (M) Forsythoside A (N) Turofexorate Isopropyl.

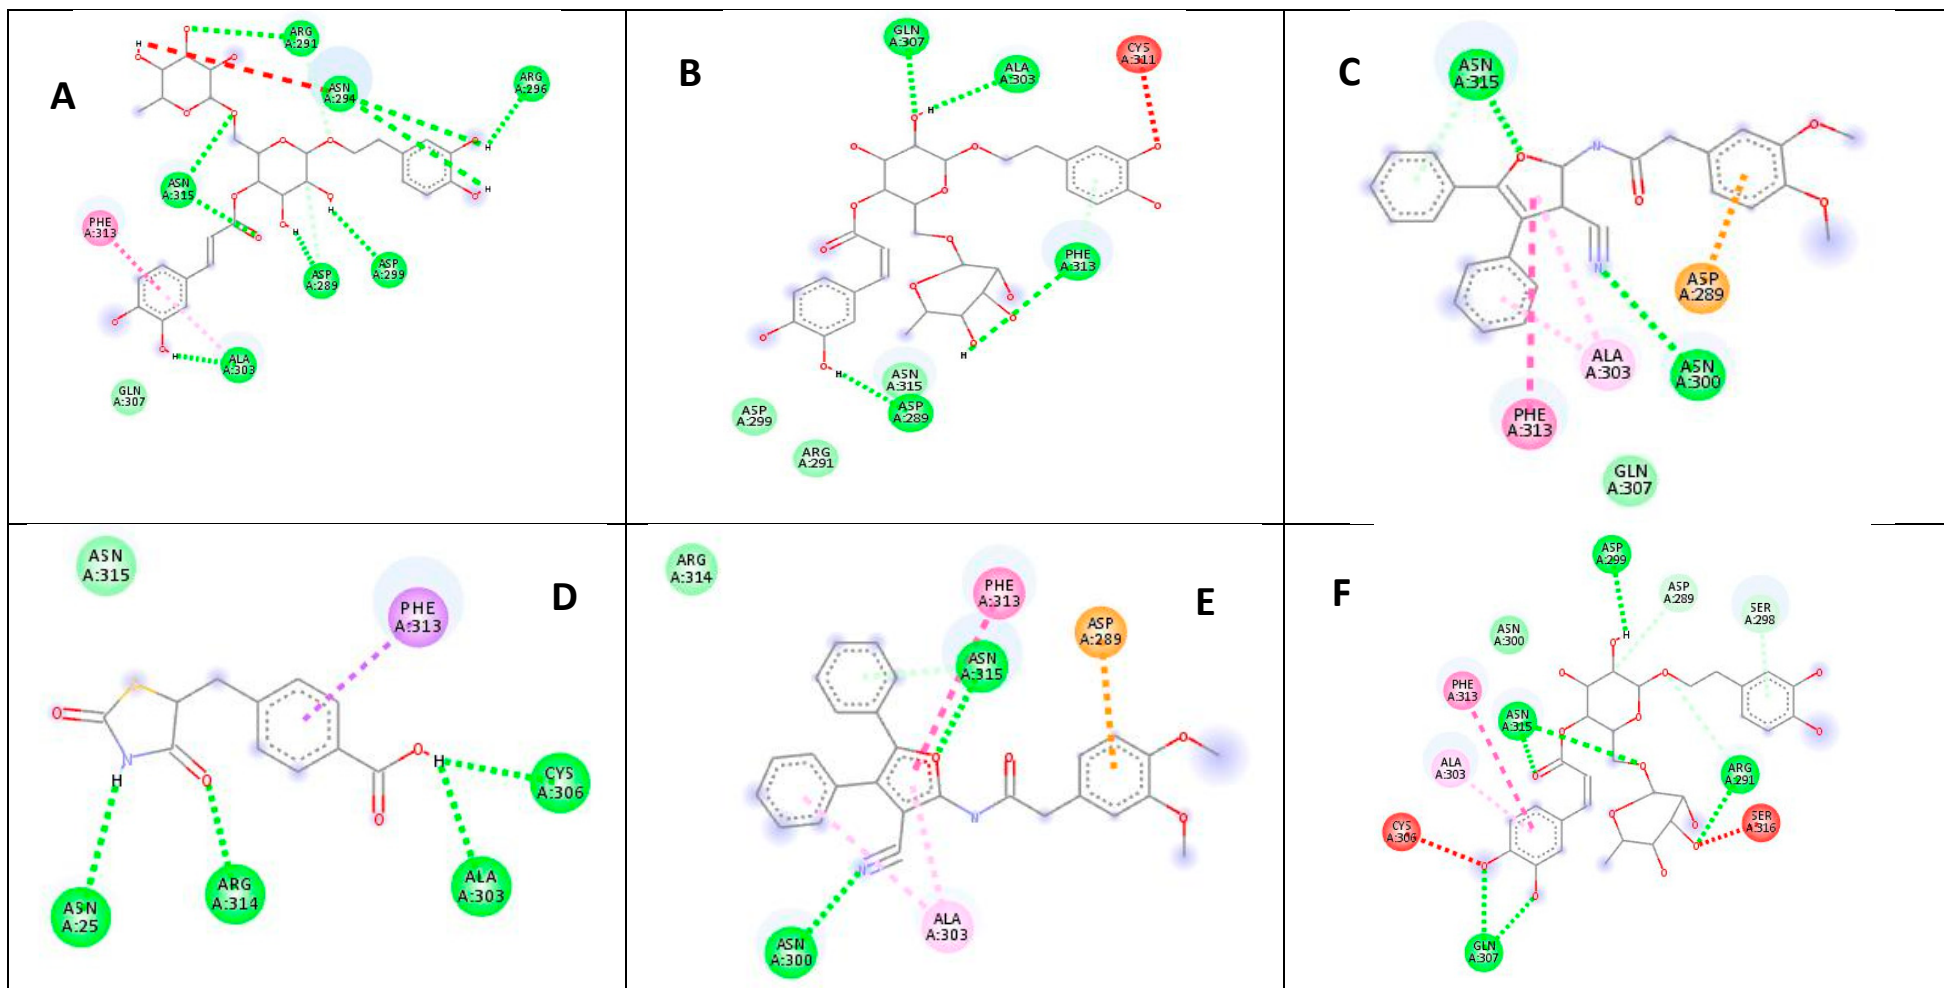

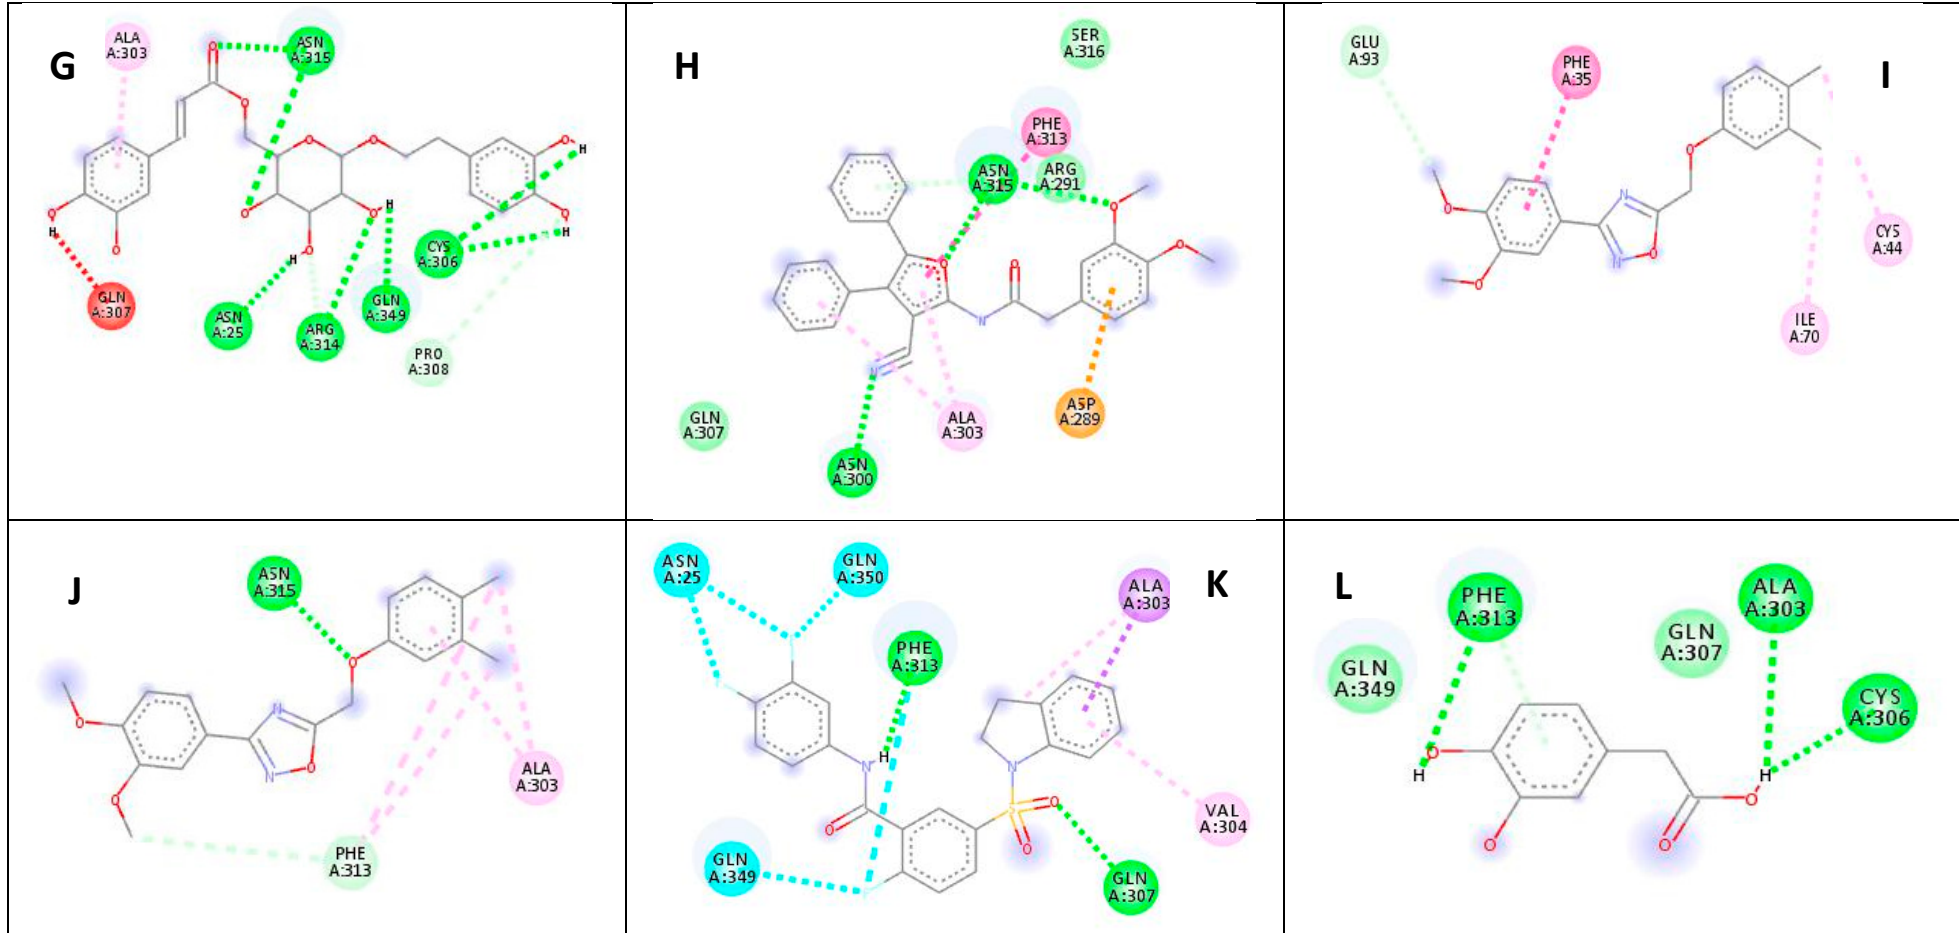

Supplement: s1 [file s1]
